# Supplementary material for: Matching ROY crystal structures to high-throughput PXRD
Source: Royal Society of Chemistry journal article supplement (doi:10.1039/d4ce00700j), 2024-01-01
Supplement: d4ce00700j2.pdf [file d4ce00700j2.pdf]

## Electronic Supplementary Information for: Matching ROY Crystal Structures to High-Throughput PXRD

Grace M. Sparrow,<sup>1</sup> R. Alex Mayo,<sup>2</sup> and Erin R. Johnson<sup>1,3,4, a)</sup>

<sup>1)</sup>*Department of Chemistry, Dalhousie University, 6243 Alumni Crescent, Halifax, Nova Scotia, B3H 4R2, Canada*

<sup>2)</sup>*Department of Chemistry and Biomolecular Science, University of Ottawa, 10 Marie-Curie Private, Ottawa, Ontario, K1N 6N5, Canada*

<sup>3)</sup>*Department of Physics and Atmospheric Science, Dalhousie University, 6310 Coburg Rd, Halifax, Nova Scotia, B3H 4R2, Canada*

<sup>4)</sup>*Yusuf Hamied Department of Chemistry, University of Cambridge, Lensfield Road, Cambridge, CB2 1EW, United Kingdom*

(Dated: 11 July 2024)

---

<sup>a)</sup>Electronic mail: erin.johnson@dal.ca

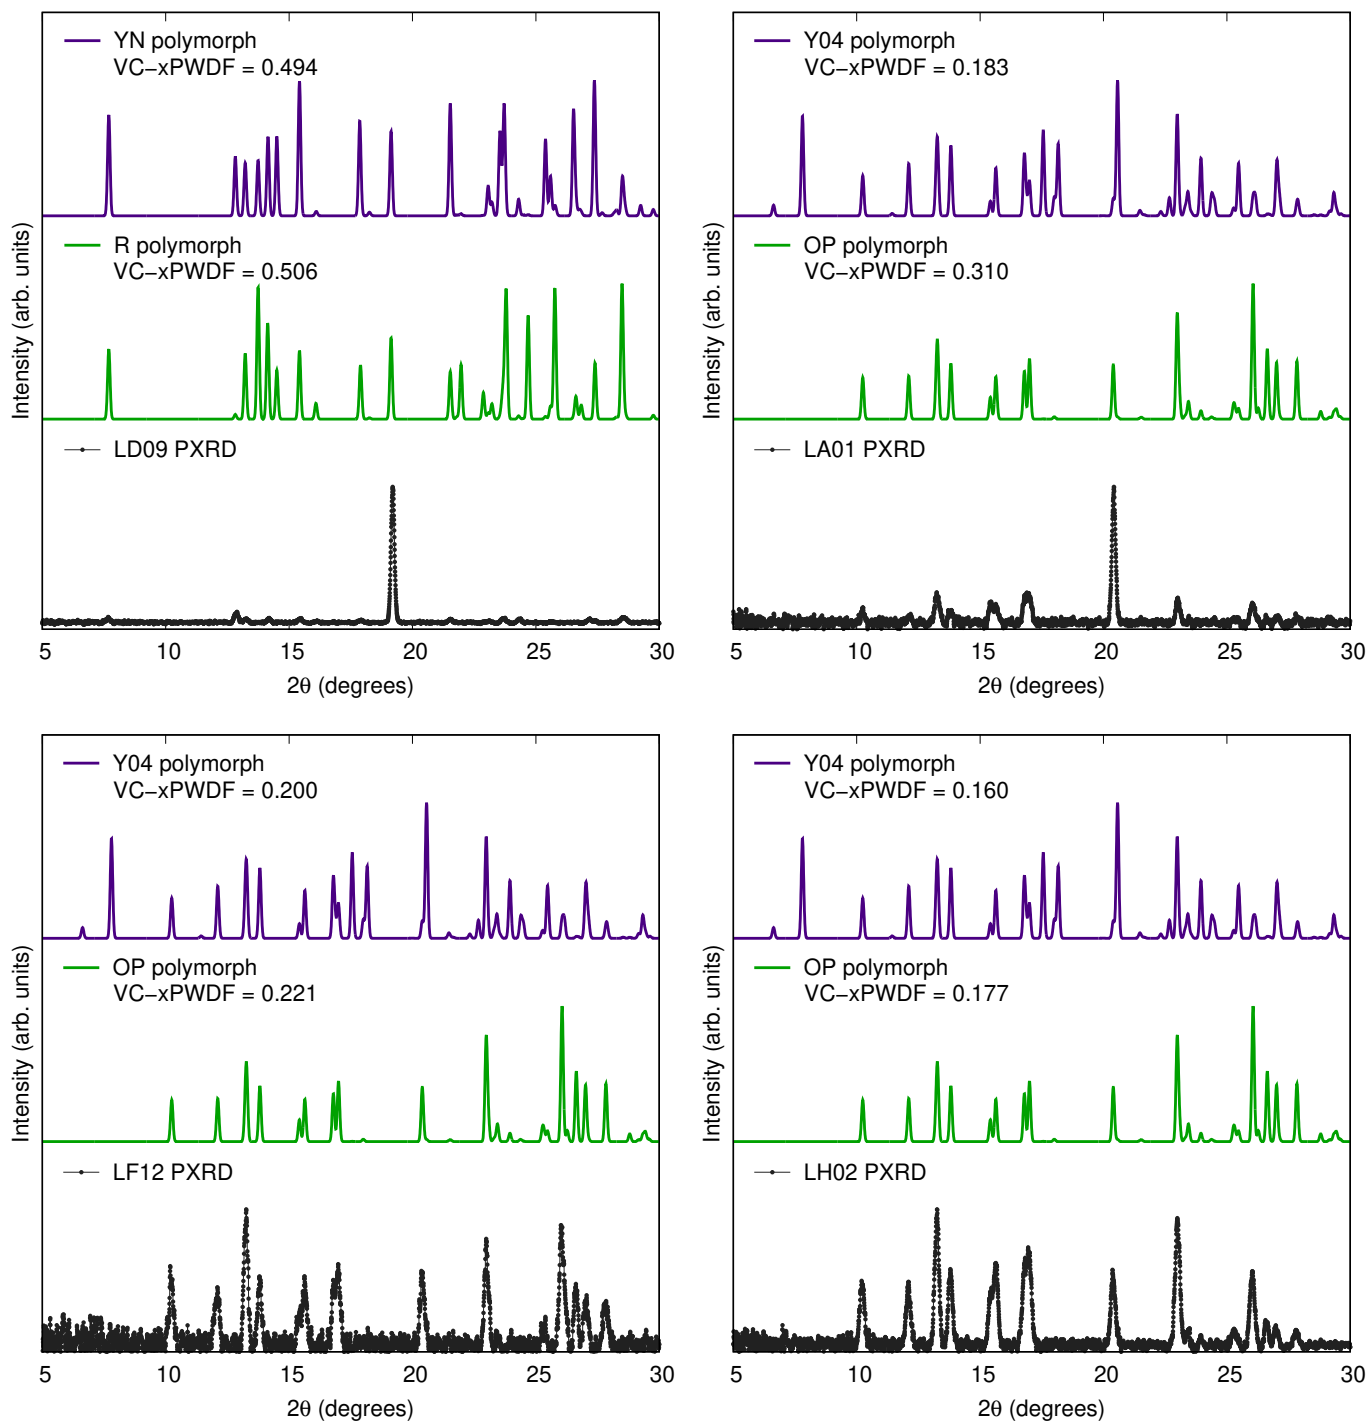

FIG. 1: The four experimental PXR D patterns (black) for which VC-xPWDF was not able to predict the correct structural match, due to either preferential orientation (top row) or excessive noise in the experimental diffractogram (bottom row). Also shown are the simulated PXR D patterns of the correct matching structure from the CSD (green) and the CSD structure that yielded the lowest VC-xPWDF score (purple).

TABLE I: VC-xPWDF scores from comparison of 75 experimental PXRD patterns with representative SC-XRD structures of each of the 12 known ROY polymorphs taken from the CSD.

| PXRD | Crystallinity | Y     | YT04  | R     | OP    | YN    | Y04   | R05   | PO13  | ON    | ORP   | R18   | Y19   |
|------|---------------|-------|-------|-------|-------|-------|-------|-------|-------|-------|-------|-------|-------|
| LA01 | 4.70          | 0.322 | 0.324 | 0.257 | 0.310 | 0.350 | 0.183 | 0.429 | 0.337 | 0.460 | 0.476 | 0.477 | 0.417 |
| LC05 | 4.70          | 0.540 | 0.382 | 0.127 | 0.386 | 0.195 | 0.317 | 0.513 | 0.346 | 0.344 | 0.425 | 0.408 | 0.363 |
| LC06 | 5.30          | 0.251 | 0.222 | 0.206 | 0.116 | 0.210 | 0.168 | 0.286 | 0.350 | 0.404 | 0.430 | 0.350 | 0.383 |
| LC07 | 5.60          | 0.548 | 0.357 | 0.084 | 0.342 | 0.158 | 0.293 | 0.495 | 0.347 | 0.358 | 0.391 | 0.426 | 0.374 |
| LC08 | 5.40          | 0.293 | 0.316 | 0.630 | 0.373 | 0.229 | 0.442 | 0.698 | 0.145 | 0.092 | 0.481 | 0.590 | 0.235 |
| LC09 | 7.40          | 0.385 | 0.427 | 0.689 | 0.469 | 0.273 | 0.528 | 0.740 | 0.123 | 0.074 | 0.517 | 0.636 | 0.296 |
| LC10 | 5.50          | 0.252 | 0.227 | 0.212 | 0.111 | 0.203 | 0.178 | 0.302 | 0.344 | 0.401 | 0.441 | 0.332 | 0.366 |
| LC11 | 6.70          | 0.356 | 0.402 | 0.657 | 0.450 | 0.284 | 0.492 | 0.715 | 0.125 | 0.094 | 0.498 | 0.613 | 0.292 |
| LC12 | 5.00          | 0.269 | 0.342 | 0.552 | 0.382 | 0.290 | 0.392 | 0.643 | 0.168 | 0.196 | 0.466 | 0.530 | 0.328 |
| LD09 | 6.40          | 0.738 | 0.714 | 0.506 | 0.701 | 0.494 | 0.517 | 0.758 | 0.698 | 0.653 | 0.722 | 0.752 | 0.701 |
| LD12 | 6.60          | 0.274 | 0.277 | 0.219 | 0.163 | 0.216 | 0.199 | 0.310 | 0.369 | 0.421 | 0.459 | 0.335 | 0.413 |
| LE01 | 6.70          | 0.323 | 0.364 | 0.635 | 0.409 | 0.259 | 0.459 | 0.692 | 0.121 | 0.100 | 0.488 | 0.584 | 0.272 |
| LE03 | 6.40          | 0.246 | 0.245 | 0.232 | 0.145 | 0.229 | 0.178 | 0.309 | 0.335 | 0.407 | 0.422 | 0.356 | 0.368 |
| LE04 | 6.00          | 0.315 | 0.350 | 0.634 | 0.407 | 0.262 | 0.451 | 0.708 | 0.166 | 0.107 | 0.487 | 0.596 | 0.265 |
| LE05 | 10.80         | 0.267 | 0.185 | 0.162 | 0.061 | 0.193 | 0.169 | 0.270 | 0.359 | 0.390 | 0.454 | 0.331 | 0.377 |
| LE08 | 9.90          | 0.254 | 0.199 | 0.161 | 0.071 | 0.201 | 0.165 | 0.270 | 0.351 | 0.384 | 0.453 | 0.340 | 0.370 |
| LE09 | 7.50          | 0.249 | 0.215 | 0.209 | 0.101 | 0.204 | 0.178 | 0.291 | 0.350 | 0.406 | 0.438 | 0.322 | 0.377 |
| LF01 | 8.00          | 0.348 | 0.376 | 0.677 | 0.435 | 0.258 | 0.496 | 0.734 | 0.129 | 0.069 | 0.493 | 0.628 | 0.252 |
| LF03 | 4.90          | 0.246 | 0.291 | 0.562 | 0.343 | 0.262 | 0.370 | 0.639 | 0.179 | 0.184 | 0.468 | 0.526 | 0.287 |
| LF04 | 4.90          | 0.255 | 0.305 | 0.567 | 0.355 | 0.251 | 0.384 | 0.651 | 0.156 | 0.163 | 0.465 | 0.532 | 0.279 |
| LF05 | 5.40          | 0.272 | 0.274 | 0.248 | 0.164 | 0.235 | 0.178 | 0.312 | 0.322 | 0.404 | 0.430 | 0.367 | 0.365 |
| LF07 | 6.40          | 0.302 | 0.334 | 0.638 | 0.391 | 0.244 | 0.450 | 0.698 | 0.132 | 0.091 | 0.480 | 0.591 | 0.252 |
| LF10 | 5.80          | 0.259 | 0.247 | 0.230 | 0.132 | 0.217 | 0.183 | 0.308 | 0.339 | 0.412 | 0.434 | 0.337 | 0.375 |
| LF12 | 4.70          | 0.282 | 0.305 | 0.272 | 0.221 | 0.266 | 0.200 | 0.350 | 0.336 | 0.413 | 0.423 | 0.382 | 0.380 |
| LG01 | 4.80          | 0.521 | 0.399 | 0.189 | 0.380 | 0.218 | 0.328 | 0.508 | 0.350 | 0.391 | 0.427 | 0.441 | 0.377 |
| LG02 | 7.90          | 0.253 | 0.221 | 0.174 | 0.093 | 0.213 | 0.160 | 0.277 | 0.336 | 0.376 | 0.445 | 0.357 | 0.355 |
| LG03 | 10.90         | 0.257 | 0.156 | 0.165 | 0.043 | 0.176 | 0.172 | 0.289 | 0.381 | 0.410 | 0.452 | 0.290 | 0.391 |
| LG04 | 12.70         | 0.253 | 0.172 | 0.165 | 0.043 | 0.186 | 0.170 | 0.284 | 0.371 | 0.412 | 0.465 | 0.307 | 0.391 |
| LG05 | 6.70          | 0.326 | 0.348 | 0.663 | 0.405 | 0.245 | 0.478 | 0.722 | 0.138 | 0.074 | 0.498 | 0.613 | 0.244 |
| LG06 | 15.90         | 0.375 | 0.350 | 0.757 | 0.435 | 0.226 | 0.552 | 0.808 | 0.177 | 0.016 | 0.528 | 0.699 | 0.182 |
| LG08 | 18.20         | 0.545 | 0.326 | 0.032 | 0.349 | 0.149 | 0.263 | 0.495 | 0.323 | 0.303 | 0.393 | 0.356 | 0.321 |
| LG09 | 14.20         | 0.262 | 0.146 | 0.159 | 0.046 | 0.178 | 0.189 | 0.256 | 0.386 | 0.425 | 0.460 | 0.302 | 0.411 |
| LG10 | 17.80         | 0.314 | 0.189 | 0.209 | 0.058 | 0.203 | 0.194 | 0.328 | 0.370 | 0.448 | 0.481 | 0.340 | 0.401 |
| LG11 | 9.10          | 0.082 | 0.492 | 0.347 | 0.360 | 0.295 | 0.174 | 0.514 | 0.427 | 0.415 | 0.383 | 0.366 | 0.412 |
| LG12 | 5.70          | 0.280 | 0.224 | 0.212 | 0.118 | 0.201 | 0.175 | 0.302 | 0.329 | 0.401 | 0.429 | 0.336 | 0.362 |
| LH01 | 7.40          | 0.135 | 0.415 | 0.275 | 0.323 | 0.231 | 0.132 | 0.441 | 0.385 | 0.367 | 0.318 | 0.378 | 0.373 |
| LH02 | 6.50          | 0.245 | 0.281 | 0.218 | 0.177 | 0.281 | 0.160 | 0.278 | 0.308 | 0.360 | 0.461 | 0.429 | 0.331 |
| LH03 | 5.40          | 0.234 | 0.263 | 0.565 | 0.339 | 0.253 | 0.360 | 0.649 | 0.202 | 0.183 | 0.461 | 0.534 | 0.262 |
| LH04 | 11.90         | 0.534 | 0.457 | 0.095 | 0.363 | 0.154 | 0.282 | 0.488 | 0.297 | 0.309 | 0.444 | 0.383 | 0.341 |
| LH05 | 16.10         | 0.028 | 0.531 | 0.374 | 0.393 | 0.311 | 0.203 | 0.515 | 0.446 | 0.419 | 0.350 | 0.428 | 0.447 |
| LH06 | 18.50         | 0.302 | 0.143 | 0.144 | 0.025 | 0.177 | 0.181 | 0.283 | 0.420 | 0.411 | 0.496 | 0.281 | 0.418 |
| LH08 | 5.40          | 0.267 | 0.265 | 0.239 | 0.157 | 0.231 | 0.175 | 0.311 | 0.335 | 0.403 | 0.431 | 0.365 | 0.372 |
| LH09 | 8.90          | 0.054 | 0.482 | 0.348 | 0.363 | 0.299 | 0.205 | 0.492 | 0.430 | 0.394 | 0.342 | 0.413 | 0.416 |
| LH10 | 10.80         | 0.256 | 0.208 | 0.177 | 0.079 | 0.180 | 0.183 | 0.254 | 0.371 | 0.414 | 0.477 | 0.301 | 0.412 |
| LH11 | 6.50          | 0.255 | 0.206 | 0.199 | 0.094 | 0.202 | 0.177 | 0.298 | 0.353 | 0.394 | 0.422 | 0.322 | 0.377 |
| LH12 | 8.60          | 0.330 | 0.268 | 0.200 | 0.171 | 0.296 | 0.177 | 0.372 | 0.390 | 0.497 | 0.525 | 0.384 | 0.475 |
| SA02 | 7.90          | 0.232 | 0.213 | 0.174 | 0.078 | 0.211 | 0.168 | 0.287 | 0.368 | 0.380 | 0.458 | 0.336 | 0.372 |
| SA03 | 5.67          | 0.140 | 0.429 | 0.325 | 0.328 | 0.292 | 0.245 | 0.513 | 0.397 | 0.402 | 0.370 | 0.379 | 0.368 |
| SA04 | 4.52          | 0.252 | 0.289 | 0.572 | 0.357 | 0.277 | 0.354 | 0.652 | 0.202 | 0.214 | 0.486 | 0.528 | 0.304 |
| SA06 | 7.47          | 0.340 | 0.351 | 0.686 | 0.414 | 0.237 | 0.496 | 0.743 | 0.143 | 0.057 | 0.501 | 0.637 | 0.219 |
| SA08 | 6.45          | 0.314 | 0.350 | 0.642 | 0.401 | 0.247 | 0.458 | 0.706 | 0.126 | 0.089 | 0.485 | 0.595 | 0.252 |
| SB01 | 5.80          | 0.263 | 0.233 | 0.218 | 0.127 | 0.212 | 0.180 | 0.317 | 0.347 | 0.404 | 0.421 | 0.330 | 0.378 |
| SB02 | 4.89          | 0.241 | 0.253 | 0.614 | 0.325 | 0.220 | 0.402 | 0.687 | 0.183 | 0.118 | 0.474 | 0.576 | 0.214 |
| SB03 | 7.93          | 0.341 | 0.340 | 0.704 | 0.411 | 0.228 | 0.509 | 0.763 | 0.153 | 0.042 | 0.507 | 0.657 | 0.201 |
| SB06 | 8.35          | 0.331 | 0.328 | 0.698 | 0.401 | 0.219 | 0.497 | 0.757 | 0.151 | 0.041 | 0.505 | 0.645 | 0.197 |
| SB08 | 7.33          | 0.293 | 0.302 | 0.651 | 0.371 | 0.222 | 0.449 | 0.717 | 0.146 | 0.075 | 0.495 | 0.606 | 0.216 |
| SB09 | 6.17          | 0.293 | 0.302 | 0.651 | 0.371 | 0.222 | 0.449 | 0.717 | 0.146 | 0.075 | 0.495 | 0.606 | 0.216 |
| SC01 | 6.58          | 0.314 | 0.307 | 0.681 | 0.383 | 0.210 | 0.477 | 0.744 | 0.157 | 0.049 | 0.505 | 0.636 | 0.196 |
| SC02 | 8.08          | 0.338 | 0.347 | 0.692 | 0.412 | 0.232 | 0.500 | 0.752 | 0.150 | 0.052 | 0.497 | 0.647 | 0.211 |
| SC03 | 8.82          | 0.333 | 0.345 | 0.687 | 0.408 | 0.233 | 0.496 | 0.746 | 0.142 | 0.054 | 0.498 | 0.637 | 0.216 |
| SC05 | 6.70          | 0.297 | 0.278 | 0.674 | 0.368 | 0.197 | 0.456 | 0.739 | 0.160 | 0.055 | 0.498 | 0.630 | 0.177 |
| SC06 | 10.50         | 0.339 | 0.322 | 0.716 | 0.402 | 0.213 | 0.509 | 0.772 | 0.161 | 0.032 | 0.513 | 0.660 | 0.180 |
| SC09 | 4.64          | 0.259 | 0.283 | 0.603 | 0.343 | 0.223 | 0.402 | 0.678 | 0.165 | 0.123 | 0.477 | 0.562 | 0.235 |
| SD02 | 4.58          | 0.263 | 0.309 | 0.579 | 0.358 | 0.249 | 0.394 | 0.655 | 0.156 | 0.158 | 0.469 | 0.538 | 0.274 |
| SD03 | 8.08          | 0.346 | 0.374 | 0.690 | 0.430 | 0.254 | 0.509 | 0.745 | 0.138 | 0.060 | 0.497 | 0.639 | 0.238 |
| SD04 | 5.45          | 0.286 | 0.291 | 0.653 | 0.357 | 0.210 | 0.446 | 0.715 | 0.153 | 0.074 | 0.494 | 0.600 | 0.205 |
| SD05 | 4.97          | 0.250 | 0.263 | 0.604 | 0.333 | 0.224 | 0.393 | 0.671 | 0.171 | 0.133 | 0.479 | 0.562 | 0.231 |
| SD11 | 4.71          | 0.250 | 0.268 | 0.593 | 0.336 | 0.218 | 0.390 | 0.673 | 0.171 | 0.131 | 0.474 | 0.554 | 0.225 |
| SD12 | 6.98          | 0.254 | 0.210 | 0.200 | 0.100 | 0.203 | 0.168 | 0.290 | 0.350 | 0.379 | 0.432 | 0.325 | 0.374 |
| SE03 | 5.55          | 0.160 | 0.425 | 0.321 | 0.317 | 0.295 | 0.250 | 0.514 | 0.381 | 0.406 | 0.384 | 0.356 | 0.359 |
| SF03 | 4.56          | 0.188 | 0.439 | 0.347 | 0.330 | 0.313 | 0.279 | 0.546 | 0.412 | 0.429 | 0.417 | 0.378 | 0.376 |
| SG01 | 4.97          | 0.256 | 0.265 | 0.619 | 0.338 | 0.216 | 0.406 | 0.688 | 0.163 | 0.110 | 0.477 | 0.574 | 0.212 |
| SG03 | 9.75          | 0.382 | 0.419 | 0.702 | 0.464 | 0.280 | 0.538 | 0.756 | 0.142 | 0.074 | 0.504 | 0.656 | 0.263 |
| SH02 | 9.93          | 0.282 | 0.205 | 0.712 | 0.346 | 0.225 | 0.460 | 0.798 | 0.314 | 0.093 | 0.531 | 0.697 | 0.118 |
| SH12 | 5.24          | 0.320 | 0.358 | 0.628 | 0.400 | 0.257 | 0.455 | 0.691 | 0.133 | 0.105 | 0.490 | 0.586 | 0.267 |

TABLE II: VC-xPWDF scores obtained from comparison of four experimental PXRD patterns with the *in silico* structures from the CSP landscape of ROY.

| CSP<br>cif | $\Delta E$<br>(kJ/mol) | VC-xPWDF scores |       |       |       |
|------------|------------------------|-----------------|-------|-------|-------|
|            |                        | 1G06            | 1G08  | 1G10  | 1H05  |
| 0          | 0.000                  | 0.502           | 0.512 | 0.182 | 0.033 |
| 1          | 0.642                  | 0.357           | 0.317 | 0.203 | 0.551 |
| 2          | 0.825                  | 0.739           | 0.037 | 0.205 | 0.372 |
| 3          | 1.607                  | 0.413           | 0.360 | 0.074 | 0.400 |
| 4          | 2.313                  | 0.204           | 0.401 | 0.196 | 0.319 |
| 5          | 2.417                  | 0.516           | 0.210 | 0.146 | 0.197 |
| 6          | 2.607                  | 0.816           | 0.499 | 0.219 | 0.509 |
| 7          | 2.682                  | 0.299           | 0.390 | 0.442 | 0.337 |
| 8          | 2.706                  | 0.591           | 0.160 | 0.153 | 0.292 |
| 9          | 2.799                  | 0.214           | 0.345 | 0.482 | 0.485 |
| 10         | 2.972                  | 0.464           | 0.364 | 0.208 | 0.307 |
| 11         | 3.016                  | 0.014           | 0.325 | 0.316 | 0.439 |
| 12         | 3.045                  | 0.646           | 0.150 | 0.167 | 0.242 |
| 13         | 3.392                  | 0.157           | 0.348 | 0.360 | 0.459 |
| 14         | 3.644                  | 0.542           | 0.346 | 0.199 | 0.155 |
| 15         | 3.747                  | 0.319           | 0.306 | 0.262 | 0.208 |
| 16         | 3.785                  | 0.110           | 0.334 | 0.248 | 0.369 |
| 17         | 4.124                  | 0.644           | 0.369 | 0.303 | 0.430 |
| 18         | 4.167                  | 0.474           | 0.206 | 0.248 | 0.319 |
| 19         | 4.239                  | 0.407           | 0.345 | 0.338 | 0.181 |
| 20         | 4.241                  | 0.173           | 0.304 | 0.536 | 0.383 |
| 21         | 4.258                  | 0.234           | 0.340 | 0.326 | 0.218 |
| 22         | 4.290                  | 0.564           | 0.392 | 0.262 | 0.330 |
| 23         | 4.371                  | 0.393           | 0.334 | 0.366 | 0.460 |
| 24         | 4.460                  | 0.159           | 0.414 | 0.281 | 0.304 |
| 25         | 4.469                  | 0.306           | 0.358 | 0.210 | 0.310 |
| 26         | 4.516                  | 0.509           | 0.429 | 0.317 | 0.411 |
| 27         | 4.593                  | 0.048           | 0.521 | 0.347 | 0.651 |
| 28         | 4.723                  | 0.193           | 0.362 | 0.382 | 0.187 |
| 29         | 4.749                  | 0.487           | 0.214 | 0.248 | 0.195 |
| 30         | 4.751                  | 0.501           | 0.377 | 0.233 | 0.317 |
| 31         | 4.860                  | 0.695           | 0.350 | 0.347 | 0.421 |
| 32         | 4.868                  | 0.446           | 0.370 | 0.172 | 0.442 |
| 33         | 4.992                  | 0.197           | 0.351 | 0.317 | 0.293 |
| 34         | 5.055                  | 0.588           | 0.328 | 0.429 | 0.332 |
| 35         | 5.142                  | 0.115           | 0.279 | 0.321 | 0.609 |
| 36         | 5.160                  | 0.817           | 0.501 | 0.347 | 0.516 |
| 37         | 5.236                  | 0.317           | 0.198 | 0.319 | 0.207 |
| 38         | 5.252                  | 0.261           | 0.350 | 0.330 | 0.210 |
| 39         | 5.269                  | 0.257           | 0.359 | 0.466 | 0.384 |
| 40         | 5.309                  | 0.441           | 0.264 | 0.255 | 0.411 |
| 41         | 5.436                  | 0.581           | 0.450 | 0.233 | 0.486 |
| 42         | 5.465                  | 0.788           | 0.366 | 0.278 | 0.295 |
| 43         | 5.610                  | 0.109           | 0.308 | 0.345 | 0.422 |
| 44         | 5.615                  | 0.164           | 0.381 | 0.382 | 0.351 |
| 45         | 5.650                  | 0.345           | 0.568 | 0.284 | 0.501 |
| 46         | 5.658                  | 0.378           | 0.323 | 0.211 | 0.433 |
| 47         | 5.693                  | 0.092           | 0.225 | 0.237 | 0.132 |
| 48         | 5.737                  | 0.296           | 0.228 | 0.489 | 0.373 |
| 49         | 5.753                  | 0.100           | 0.329 | 0.267 | 0.184 |
| 50         | 5.766                  | 0.194           | 0.327 | 0.288 | 0.225 |
| 51         | 5.791                  | 0.405           | 0.354 | 0.257 | 0.241 |
| 52         | 5.800                  | 0.383           | 0.170 | 0.142 | 0.226 |
| 53         | 5.802                  | 0.241           | 0.365 | 0.212 | 0.421 |
| 54         | 5.829                  | 0.344           | 0.539 | 0.370 | 0.426 |
| 55         | 5.965                  | 0.606           | 0.281 | 0.254 | 0.425 |
| 56         | 6.007                  | 0.322           | 0.438 | 0.193 | 0.334 |
| 57         | 6.042                  | 0.715           | 0.373 | 0.490 | 0.324 |
| 58         | 6.075                  | 0.593           | 0.124 | 0.179 | 0.381 |
| 59         | 6.088                  | 0.180           | 0.523 | 0.543 | 0.312 |
| 60         | 6.132                  | 0.707           | 0.405 | 0.188 | 0.359 |
| 61         | 6.168                  | 0.377           | 0.442 | 0.570 | 0.293 |
| 62         | 6.182                  | 0.513           | 0.413 | 0.585 | 0.564 |

Continued

| CSP<br>cif | $\Delta E$<br>(kJ/mol) | VC-xPWFDF scores |       |       |       |
|------------|------------------------|------------------|-------|-------|-------|
|            |                        | 1G06             | 1G08  | 1G10  | 1H05  |
| 63         | 6.238                  | 0.345            | 0.327 | 0.462 | 0.291 |
| 64         | 6.286                  | 0.502            | 0.389 | 0.527 | 0.590 |
| 65         | 6.322                  | 0.153            | 0.266 | 0.345 | 0.520 |
| 66         | 6.497                  | 0.472            | 0.314 | 0.251 | 0.362 |
| 67         | 6.501                  | 0.465            | 0.398 | 0.164 | 0.175 |
| 68         | 6.516                  | 0.052            | 0.505 | 0.351 | 0.412 |
| 69         | 6.591                  | 0.647            | 0.108 | 0.213 | 0.242 |
| 70         | 6.604                  | 0.296            | 0.273 | 0.351 | 0.470 |
| 71         | 6.606                  | 0.167            | 0.311 | 0.435 | 0.505 |
| 72         | 6.654                  | 0.128            | 0.341 | 0.455 | 0.503 |
| 73         | 6.662                  | 0.523            | 0.393 | 0.374 | 0.277 |
| 74         | 6.736                  | 0.511            | 0.572 | 0.272 | 0.070 |
| 75         | 6.745                  | 0.354            | 0.324 | 0.197 | 0.229 |
| 76         | 6.797                  | 0.241            | 0.442 | 0.339 | 0.216 |
| 77         | 6.805                  | 0.376            | 0.579 | 0.476 | 0.184 |
| 78         | 6.815                  | 0.374            | 0.264 | 0.292 | 0.232 |
| 79         | 6.829                  | 0.760            | 0.315 | 0.190 | 0.101 |
| 80         | 6.853                  | 0.283            | 0.354 | 0.291 | 0.367 |
| 81         | 6.871                  | 0.211            | 0.269 | 0.384 | 0.324 |
| 82         | 6.895                  | 0.289            | 0.220 | 0.203 | 0.386 |
| 83         | 6.901                  | 0.520            | 0.417 | 0.350 | 0.371 |
| 84         | 6.916                  | 0.642            | 0.355 | 0.252 | 0.310 |
| 85         | 6.919                  | 0.304            | 0.355 | 0.308 | 0.385 |
| 86         | 6.955                  | 0.559            | 0.228 | 0.248 | 0.140 |
| 87         | 6.957                  | 0.728            | 0.204 | 0.203 | 0.557 |
| 88         | 6.958                  | 0.634            | 0.168 | 0.359 | 0.481 |
| 89         | 6.986                  | 0.324            | 0.257 | 0.178 | 0.234 |
| 90         | 6.990                  | 0.648            | 0.304 | 0.276 | 0.421 |
| 91         | 6.995                  | 0.561            | 0.351 | 0.565 | 0.351 |
| 92         | 7.038                  | 0.232            | 0.345 | 0.351 | 0.214 |
| 93         | 7.110                  | 0.337            | 0.439 | 0.377 | 0.404 |
| 94         | 7.147                  | 0.107            | 0.392 | 0.364 | 0.217 |
| 95         | 7.153                  | 0.235            | 0.317 | 0.191 | 0.340 |
| 96         | 7.162                  | 0.704            | 0.114 | 0.166 | 0.283 |
| 97         | 7.201                  | 0.547            | 0.337 | 0.311 | 0.389 |
| 98         | 7.231                  | 0.568            | 0.325 | 0.311 | 0.339 |
| 99         | 7.279                  | 0.530            | 0.341 | 0.252 | 0.365 |
| 100        | 7.362                  | 0.165            | 0.295 | 0.534 | 0.495 |
| 101        | 7.492                  | 0.496            | 0.273 | 0.284 | 0.339 |
| 102        | 7.532                  | 0.470            | 0.272 | 0.232 | 0.250 |
| 103        | 7.579                  | 0.180            | 0.228 | 0.367 | 0.268 |
| 104        | 7.586                  | 0.411            | 0.285 | 0.250 | 0.311 |
| 105        | 7.605                  | 0.133            | 0.353 | 0.321 | 0.674 |
| 106        | 7.609                  | 0.191            | 0.336 | 0.344 | 0.200 |
| 107        | 7.627                  | 0.856            | 0.307 | 0.585 | 0.601 |
| 108        | 7.765                  | 0.639            | 0.284 | 0.392 | 0.343 |
| 109        | 7.784                  | 0.331            | 0.321 | 0.137 | 0.415 |
| 110        | 7.790                  | 0.359            | 0.361 | 0.174 | 0.425 |
| 111        | 7.803                  | 0.766            | 0.339 | 0.360 | 0.461 |
| 112        | 7.813                  | 0.475            | 0.304 | 0.363 | 0.367 |
| 113        | 7.853                  | 0.241            | 0.397 | 0.450 | 0.385 |
| 114        | 7.900                  | 0.242            | 0.225 | 0.360 | 0.402 |
| 115        | 7.948                  | 0.253            | 0.305 | 0.306 | 0.305 |
| 116        | 8.069                  | 0.634            | 0.484 | 0.178 | 0.519 |
| 117        | 8.069                  | 0.444            | 0.193 | 0.219 | 0.224 |
| 118        | 8.073                  | 0.303            | 0.425 | 0.373 | 0.203 |
| 119        | 8.134                  | 0.112            | 0.416 | 0.354 | 0.279 |
| 120        | 8.152                  | 0.266            | 0.451 | 0.260 | 0.326 |
| 121        | 8.163                  | 0.548            | 0.441 | 0.303 | 0.402 |
| 122        | 8.166                  | 0.549            | 0.404 | 0.389 | 0.251 |
| 123        | 8.169                  | 0.383            | 0.335 | 0.171 | 0.403 |
| 124        | 8.211                  | 0.312            | 0.643 | 0.308 | 0.662 |
| 125        | 8.216                  | 0.690            | 0.397 | 0.349 | 0.269 |
| 126        | 8.239                  | 0.476            | 0.622 | 0.488 | 0.302 |
| 127        | 8.272                  | 0.834            | 0.306 | 0.335 | 0.351 |
| 128        | 8.285                  | 0.757            | 0.287 | 0.354 | 0.312 |
| 129        | 8.295                  | 0.566            | 0.406 | 0.285 | 0.311 |

Continued

| CSP<br>cif | $\Delta E$<br>(kJ/mol) | VC-xPWFDF scores |       |       |       |
|------------|------------------------|------------------|-------|-------|-------|
|            |                        | 1G06             | 1G08  | 1G10  | 1H05  |
| 130        | 8.459                  | 0.436            | 0.427 | 0.285 | 0.353 |
| 131        | 8.468                  | 0.740            | 0.183 | 0.189 | 0.490 |
| 132        | 8.527                  | 0.091            | 0.167 | 0.209 | 0.320 |
| 133        | 8.556                  | 0.411            | 0.388 | 0.151 | 0.463 |
| 134        | 8.578                  | 0.582            | 0.306 | 0.300 | 0.441 |
| 135        | 8.595                  | 0.551            | 0.292 | 0.346 | 0.246 |
| 136        | 8.704                  | 0.589            | 0.421 | 0.249 | 0.294 |
| 137        | 8.721                  | 0.634            | 0.146 | 0.174 | 0.437 |
| 138        | 8.760                  | 0.214            | 0.367 | 0.288 | 0.224 |
| 139        | 8.771                  | 0.573            | 0.439 | 0.232 | 0.391 |
| 140        | 8.801                  | 0.297            | 0.315 | 0.304 | 0.469 |
| 141        | 8.819                  | 0.619            | 0.429 | 0.409 | 0.462 |
| 142        | 8.831                  | 0.118            | 0.394 | 0.320 | 0.287 |
| 143        | 8.860                  | 0.466            | 0.476 | 0.215 | 0.183 |
| 144        | 8.909                  | 0.306            | 0.203 | 0.250 | 0.327 |
| 145        | 8.925                  | 0.460            | 0.274 | 0.267 | 0.284 |
| 146        | 8.938                  | 0.418            | 0.259 | 0.408 | 0.287 |
| 147        | 8.943                  | 0.170            | 0.209 | 0.143 | 0.386 |
| 148        | 8.995                  | 0.254            | 0.400 | 0.487 | 0.425 |
| 149        | 9.006                  | 0.612            | 0.313 | 0.529 | 0.241 |
| 150        | 9.041                  | 0.234            | 0.506 | 0.330 | 0.297 |
| 151        | 9.043                  | 0.465            | 0.539 | 0.525 | 0.525 |
| 152        | 9.084                  | 0.131            | 0.454 | 0.279 | 0.299 |
| 153        | 9.173                  | 0.354            | 0.447 | 0.389 | 0.268 |
| 154        | 9.246                  | 0.540            | 0.323 | 0.400 | 0.340 |
| 155        | 9.269                  | 0.514            | 0.301 | 0.317 | 0.284 |
| 156        | 9.299                  | 0.213            | 0.322 | 0.296 | 0.220 |
| 157        | 9.335                  | 0.109            | 0.441 | 0.346 | 0.250 |
| 158        | 9.357                  | 0.395            | 0.453 | 0.169 | 0.407 |
| 159        | 9.418                  | 0.346            | 0.213 | 0.155 | 0.120 |
| 160        | 9.463                  | 0.661            | 0.376 | 0.330 | 0.384 |
| 161        | 9.470                  | 0.440            | 0.437 | 0.311 | 0.208 |
| 162        | 9.474                  | 0.559            | 0.437 | 0.343 | 0.378 |
| 163        | 9.570                  | 0.691            | 0.226 | 0.257 | 0.192 |
| 164        | 9.592                  | 0.490            | 0.231 | 0.314 | 0.413 |
| 165        | 9.688                  | 0.374            | 0.217 | 0.328 | 0.416 |
| 166        | 9.732                  | 0.315            | 0.386 | 0.179 | 0.408 |
| 167        | 9.813                  | 0.494            | 0.249 | 0.304 | 0.226 |
| 168        | 9.816                  | 0.565            | 0.359 | 0.516 | 0.299 |
| 169        | 9.825                  | 0.308            | 0.312 | 0.259 | 0.180 |
| 170        | 9.859                  | 0.334            | 0.435 | 0.329 | 0.583 |
| 171        | 9.917                  | 0.679            | 0.243 | 0.133 | 0.459 |
| 172        | 9.979                  | 0.678            | 0.317 | 0.197 | 0.121 |
| 173        | 9.991                  | 0.651            | 0.214 | 0.200 | 0.431 |
| 174        | 10.029                 | 0.339            | 0.382 | 0.254 | 0.403 |
| 175        | 10.040                 | 0.245            | 0.418 | 0.374 | 0.312 |
| 176        | 10.064                 | 0.600            | 0.383 | 0.340 | 0.281 |
| 177        | 10.072                 | 0.295            | 0.415 | 0.312 | 0.329 |
| 178        | 10.111                 | 0.219            | 0.376 | 0.254 | 0.198 |
| 179        | 10.115                 | 0.431            | 0.344 | 0.352 | 0.274 |
| 180        | 10.149                 | 0.242            | 0.371 | 0.193 | 0.357 |
| 181        | 10.204                 | 0.332            | 0.218 | 0.270 | 0.319 |
| 182        | 10.215                 | 0.317            | 0.477 | 0.490 | 0.317 |
| 183        | 10.242                 | 0.374            | 0.304 | 0.435 | 0.418 |
| 184        | 10.263                 | 0.079            | 0.433 | 0.318 | 0.411 |
| 185        | 10.284                 | 0.549            | 0.332 | 0.511 | 0.361 |
| 186        | 10.303                 | 0.398            | 0.368 | 0.190 | 0.341 |
| 187        | 10.331                 | 0.446            | 0.382 | 0.282 | 0.423 |
| 188        | 10.467                 | 0.638            | 0.559 | 0.331 | 0.530 |
| 189        | 10.487                 | 0.357            | 0.496 | 0.195 | 0.424 |
| 190        | 10.521                 | 0.876            | 0.374 | 0.364 | 0.412 |
| 191        | 10.551                 | 0.527            | 0.277 | 0.329 | 0.261 |
| 192        | 10.551                 | 0.142            | 0.423 | 0.349 | 0.191 |
| 193        | 10.608                 | 0.351            | 0.449 | 0.382 | 0.529 |
| 194        | 10.672                 | 0.509            | 0.456 | 0.191 | 0.319 |
| 195        | 10.694                 | 0.392            | 0.420 | 0.182 | 0.473 |
| 196        | 10.712                 | 0.549            | 0.658 | 0.587 | 0.319 |

Continued

| CSP<br>cif | $\Delta E$<br>(kJ/mol) | VC-xPWFDF scores |       |       |       |
|------------|------------------------|------------------|-------|-------|-------|
|            |                        | 1G06             | 1G08  | 1G10  | 1H05  |
| 197        | 10.733                 | 0.331            | 0.345 | 0.414 | 0.183 |
| 198        | 10.737                 | 0.706            | 0.303 | 0.275 | 0.236 |
| 199        | 10.768                 | 0.186            | 0.456 | 0.542 | 0.336 |
| 200        | 10.783                 | 0.180            | 0.371 | 0.312 | 0.333 |
| 201        | 10.789                 | 0.589            | 0.301 | 0.282 | 0.256 |
| 202        | 10.828                 | 0.341            | 0.328 | 0.218 | 0.373 |
| 203        | 10.832                 | 0.438            | 0.449 | 0.184 | 0.179 |
| 204        | 10.848                 | 0.569            | 0.371 | 0.445 | 0.267 |
| 205        | 10.899                 | 0.702            | 0.472 | 0.395 | 0.420 |
| 206        | 10.925                 | 0.535            | 0.242 | 0.309 | 0.315 |
| 207        | 10.938                 | 0.301            | 0.345 | 0.150 | 0.267 |
| 208        | 10.975                 | 0.531            | 0.341 | 0.539 | 0.488 |
| 209        | 11.023                 | 0.279            | 0.295 | 0.218 | 0.145 |
| 210        | 11.025                 | 0.527            | 0.380 | 0.603 | 0.541 |
| 211        | 11.131                 | 0.705            | 0.233 | 0.297 | 0.383 |
| 212        | 11.190                 | 0.246            | 0.197 | 0.345 | 0.318 |
| 213        | 11.278                 | 0.783            | 0.527 | 0.446 | 0.587 |
| 214        | 11.329                 | 0.443            | 0.392 | 0.196 | 0.230 |
| 215        | 11.419                 | 0.435            | 0.447 | 0.278 | 0.536 |
| 216        | 11.436                 | 0.852            | 0.273 | 0.463 | 0.537 |
| 217        | 11.445                 | 0.714            | 0.350 | 0.412 | 0.581 |
| 218        | 11.542                 | 0.588            | 0.291 | 0.303 | 0.249 |
| 219        | 11.588                 | 0.716            | 0.344 | 0.223 | 0.300 |
| 220        | 11.623                 | 0.757            | 0.349 | 0.369 | 0.280 |
| 221        | 11.638                 | 0.469            | 0.432 | 0.363 | 0.544 |
| 222        | 11.664                 | 0.592            | 0.308 | 0.273 | 0.360 |
| 223        | 11.775                 | 0.589            | 0.284 | 0.207 | 0.450 |
| 224        | 11.941                 | 0.356            | 0.298 | 0.210 | 0.457 |
| 225        | 11.985                 | 0.616            | 0.369 | 0.408 | 0.375 |
| 226        | 12.180                 | 0.511            | 0.317 | 0.239 | 0.418 |
| 227        | 12.215                 | 0.570            | 0.194 | 0.188 | 0.259 |
| 228        | 12.286                 | 0.545            | 0.220 | 0.171 | 0.234 |
| 229        | 12.349                 | 0.526            | 0.403 | 0.339 | 0.479 |
| 230        | 12.532                 | 0.782            | 0.327 | 0.296 | 0.492 |
| 231        | 12.560                 | 0.257            | 0.475 | 0.254 | 0.254 |
| 232        | 12.634                 | 0.713            | 0.545 | 0.236 | 0.613 |
| 233        | 12.634                 | 0.789            | 0.316 | 0.351 | 0.468 |
| 234        | 12.677                 | 0.369            | 0.144 | 0.170 | 0.244 |
| 235        | 12.692                 | 0.857            | 0.584 | 0.452 | 0.495 |
| 236        | 12.702                 | 0.768            | 0.330 | 0.265 | 0.522 |
| 237        | 12.757                 | 0.815            | 0.315 | 0.400 | 0.497 |
| 238        | 12.860                 | 0.847            | 0.570 | 0.354 | 0.601 |
| 239        | 12.886                 | 0.829            | 0.534 | 0.216 | 0.584 |
| 240        | 12.943                 | 0.646            | 0.485 | 0.275 | 0.613 |
| 241        | 13.071                 | 0.358            | 0.275 | 0.377 | 0.319 |
| 242        | 13.138                 | 0.843            | 0.359 | 0.353 | 0.503 |
| 243        | 13.165                 | 0.802            | 0.257 | 0.295 | 0.467 |
| 244        | 13.275                 | 0.441            | 0.557 | 0.397 | 0.480 |
| 245        | 13.354                 | 0.537            | 0.404 | 0.364 | 0.356 |
| 246        | 13.409                 | 0.514            | 0.585 | 0.341 | 0.348 |
| 247        | 13.426                 | 0.640            | 0.389 | 0.267 | 0.407 |
| 248        | 13.530                 | 0.802            | 0.468 | 0.423 | 0.545 |
| 249        | 13.567                 | 0.397            | 0.404 | 0.206 | 0.389 |
| 250        | 13.784                 | 0.483            | 0.341 | 0.292 | 0.413 |
| 251        | 13.823                 | 0.626            | 0.340 | 0.408 | 0.391 |
| 252        | 13.873                 | 0.585            | 0.319 | 0.266 | 0.480 |
| 253        | 14.219                 | 0.661            | 0.404 | 0.347 | 0.271 |
| 254        | 14.286                 | 0.455            | 0.392 | 0.360 | 0.452 |
| 255        | 14.402                 | 0.460            | 0.255 | 0.229 | 0.254 |
| 256        | 14.524                 | 0.657            | 0.471 | 0.314 | 0.434 |
| 257        | 14.938                 | 0.591            | 0.300 | 0.340 | 0.413 |
| 258        | 15.242                 | 0.488            | 0.290 | 0.302 | 0.310 |
| 259        | 15.817                 | 0.762            | 0.321 | 0.398 | 0.415 |
| 260        | 16.133                 | 0.481            | 0.383 | 0.200 | 0.458 |
| 261        | 16.592                 | 0.663            | 0.445 | 0.258 | 0.583 |
| 262        | 16.748                 | 0.661            | 0.467 | 0.329 | 0.555 |
| 263        | 17.512                 | 0.342            | 0.535 | 0.373 | 0.558 |
